# Supplementary material for: Major Stressors Favoring Cholera Trigger and Dissemination in Guinea-Bissau (West Africa)
Source: MDPI journal article supplement (doi:10.3390/ijerph182111296), 2021-10-27
Supplement: s1 [file s1]

## Major Stressors Favoring Cholera Trigger and Dissemination in Guinea-Bissau (West Africa)

Ana Machado<sup>1, 2\*</sup>, Eva Amorim<sup>1, 2</sup>, Adriano A. Bordalo<sup>1, 2</sup>

<sup>1</sup>ICBAS—UP, Institute of Biomedical Sciences Abel Salazar—University of Porto, Rua Jorge Viterbo Ferreira 228, 4050-313 Porto, Portugal

<sup>2</sup>CIIMAR—UP, Interdisciplinary Centre of Marine and Environmental Research of the University of Porto, Novo Edifício do Terminal de Cruzeiros do Porto de Leixões, Avenida General Norton de Matos, S/N, 4450-208 Matosinhos, Portugal

\*[ammachado@icbas.up.pt](mailto:ammachado@icbas.up.pt)

**Table S1.** Annual average of the environmental parameters for the studied time series period. SST - sea surface temperature.

| Year                        | Air temperature<br>(°C) | Rainfall<br>(mm) | SST<br>(°C)  | Salinity     |
|-----------------------------|-------------------------|------------------|--------------|--------------|
| 1986                        | 27.79                   | 1120             | 27.87        | 35.04        |
| 1987                        | 28.25                   | 1106             | 28.82        | 34.87        |
| 1988                        | 28.11                   | 1229             | 28.26        | 34.96        |
| 1989                        | 27.69                   | 1191             | 28.49        | 34.84        |
| 1990                        | 28.35                   | 955              | 28.34        | 34.87        |
| 1991                        | 28.46                   | 1004             | 28.11        | 34.68        |
| 1992                        | 28.12                   | 1066             | 28.27        | 34.69        |
| 1993                        | 28.18                   | 1127             | 28.55        | 34.58        |
| 1994                        | 28.01                   | 1204             | 28.17        | 34.61        |
| 1995                        | 28.45                   | 1131             | 28.63        | 34.80        |
| 1996                        | 28.74                   | 1094             | 28.84        | 34.76        |
| 1997                        | 28.44                   | 1106             | 28.93        | 34.70        |
| 1998                        | 29.50                   | 1113             | 28.88        | 34.86        |
| 1999                        | 29.20                   | 1345             | 28.16        | 34.69        |
| 2000                        | 29.72                   | 1223             | 28.75        | 34.39        |
| 2001                        | 29.26                   | 1143             | 29.09        | 34.47        |
| 2002                        | 29.51                   | 969              | 28.73        | 34.61        |
| 2003                        | 29.79                   | 1258             | 28.52        | 34.74        |
| 2004                        | 29.57                   | 1049             | 28.79        | 34.89        |
| 2005                        | 30.57                   | 1111             | 29.29        | 34.71        |
| 2006                        | 28.51                   | 1070             | 28.95        | 34.52        |
| 2007                        | 28.67                   | 876              | 28.79        | 34.79        |
| 2008                        | 28.52                   | 1238             | 29.24        | 34.58        |
| 2009                        | 28.57                   | 1038             | 28.34        | 34.57        |
| 2010                        | 28.93                   | 1156             | 29.46        | 34.23        |
| 2011                        | 28.59                   | 844              | 28.96        | 34.52        |
| 2012                        | 28.63                   | 1160             | 28.51        | 34.32        |
| 2013                        | 28.74                   | 1160             | 30.02        | 34.29        |
| <b>27-years<br/>average</b> | <b>28.75</b>            | <b>1110</b>      | <b>28.71</b> | <b>34.66</b> |

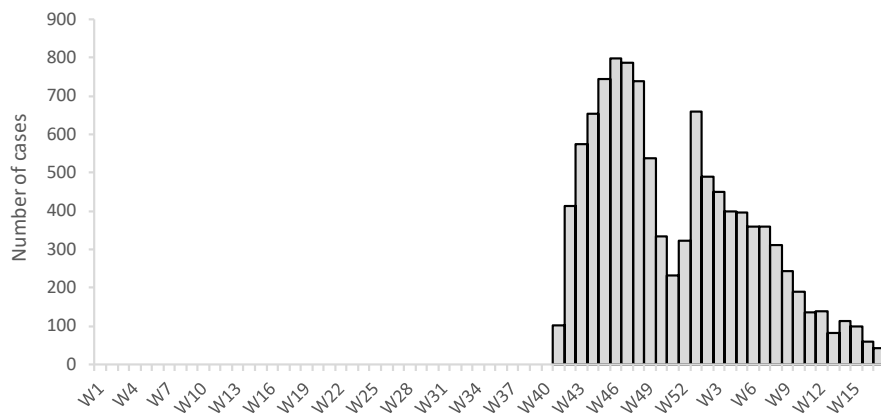

**Figure S1.** Weekly number of cholera cases in Guinea-Bissau between January 1996 and April 1997. Original data from WHO ([www.who.int/wer/en/](http://www.who.int/wer/en/))

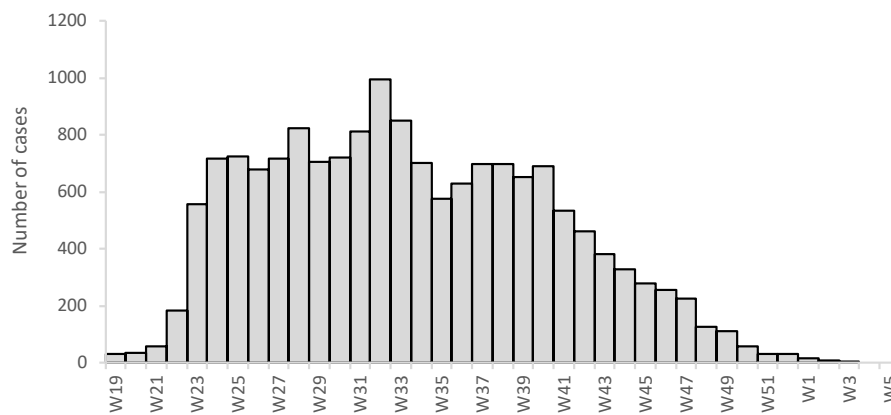

**Figure S2.** Weekly number of cholera cases in Guinea-Bissau between May 1997 and January 1998. Original data from WHO ([www.who.int/wer/en/](http://www.who.int/wer/en/))

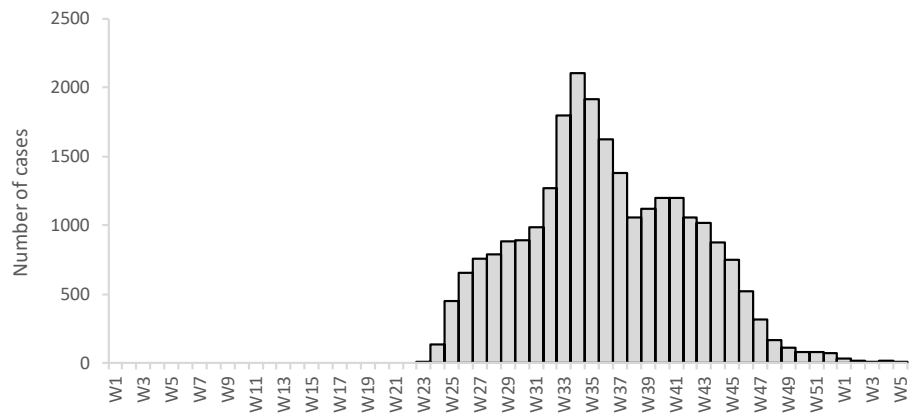

**Figure S3.** Weekly number of cholera cases in Guinea-Bissau between June 2005 and February 2006. Original data from WHO ([www.who.int/wer/en/](http://www.who.int/wer/en/))

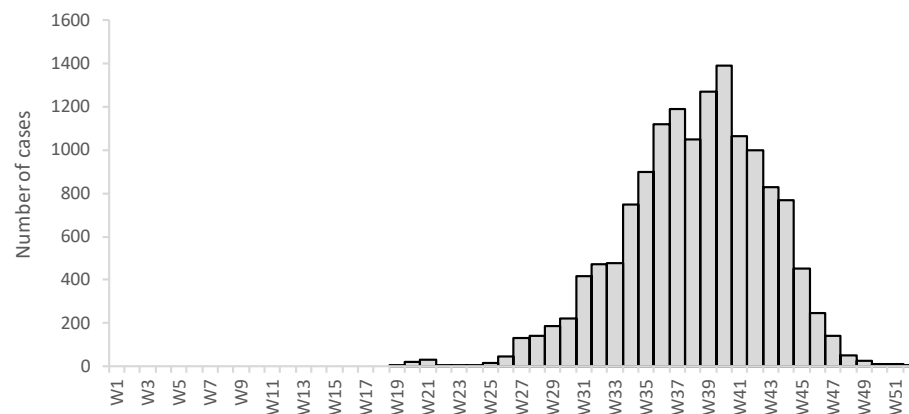

**Figure S4.** Weekly number of cholera cases in Guinea-Bissau between May 2008 and January 2009. Original data from WHO ([www.who.int/wer/en/](http://www.who.int/wer/en/))

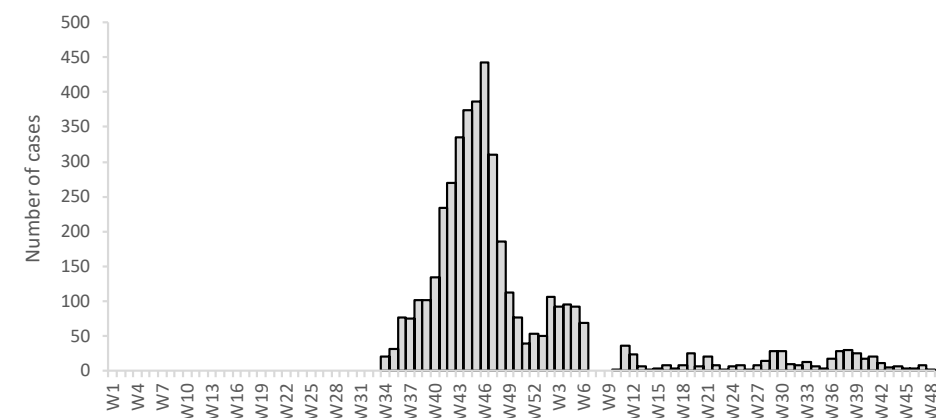

**Figure S5.** Weekly number of cholera cases in Guinea-Bissau between August 2012 and November 2013. Original data from WHO ([www.who.int/wer/en/](http://www.who.int/wer/en/))

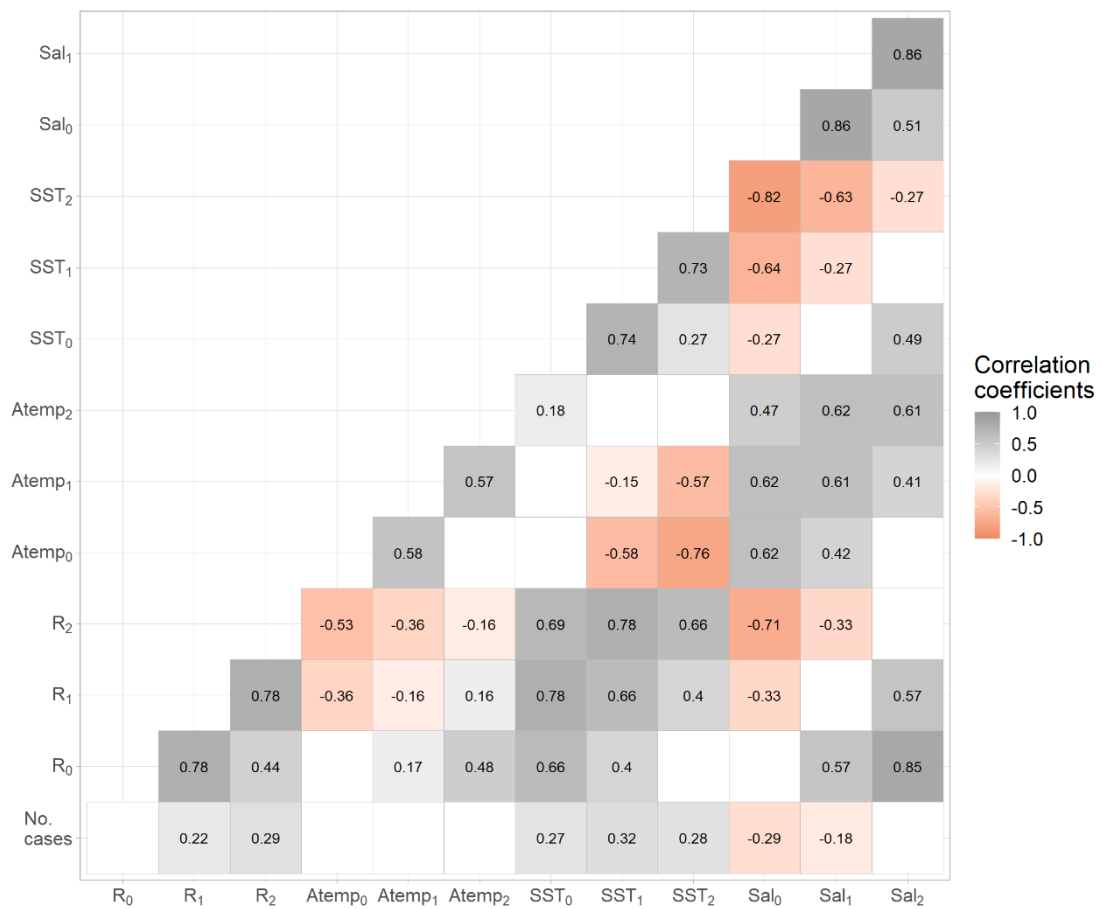

**Figure S6.** Matrix of Spearman correlations between the monthly number of cholera cases and the environmental variables. All correlations shown are significant at  $p < 0.05$ . No. cases – number of cholera cases; R – rainfall; Atemp – air temperature; SST – sea surface temperature; Sal – salinity. The environmental variables are referenced with a number indicating their time lag relative to the time when cholera cases were observed (0 – no Lag, 1 – one month prior to the observation of cholera cases observed, 2 – two months prior to the observation of cholera cases).
